# Supplementary material for: Enhanced Glucose Uptake in Human Liver Cells and Inhibition of Carbohydrate Hydrolyzing Enzymes by Nordic Berry Extracts
Source: Molecules. 2017 Oct 24;22(10):1806. doi: 10.3390/molecules22101806 (PMC6151378; doi:10.3390/molecules22101806)

## **Supplementary material**

### **Enhanced glucose uptake in human liver cells and inhibition of carbohydrate hydrolyzing enzymes by Nordic berry extracts**

Giang Thanh Thi Ho<sup>a</sup>, Thi Kim Yen Nguyen<sup>a,b</sup>, Eili Tranheim Kase<sup>b</sup>, Margey Tadesse<sup>a</sup>, Hilde Barsett<sup>a</sup> and Helle Wangensteen<sup>a\*</sup>

<sup>a</sup>Department of Pharmaceutical Chemistry, School of Pharmacy, University of Oslo, P. O. Box 1068 Blindern, 0316 Oslo, Norway

<sup>b</sup>Department of Pharmaceutical Biosciences, School of Pharmacy, University of Oslo, P. O. Box 1068 Blindern, 0316 Oslo, Norway

### **Supplementary material: <sup>1</sup>H NMR spectra of SPE berry extracts used in this study.**

- S1. Bilberry SPE Extract
- S2. Blackberry SPE Extract
- S3. Black Chokeberry SPE Extract
- S4. Black Currant SPE Extract
- S5. Blueberry SPE Extract
- S6. Bog Whortleberry SPE Extract
- S7. Cloudberry SPE Extract
- S8. Crowberry SPE Extract
- S9. Elderberry SPE Extract
- S10. Lingonberry SPE Extract
- S11. Raspberry SPE Extract
- S12. Red Currant SPE Extract
- S13. Rowanberry SPE Extract
- S14. Sea Buckthorn SPE Extract

S1.

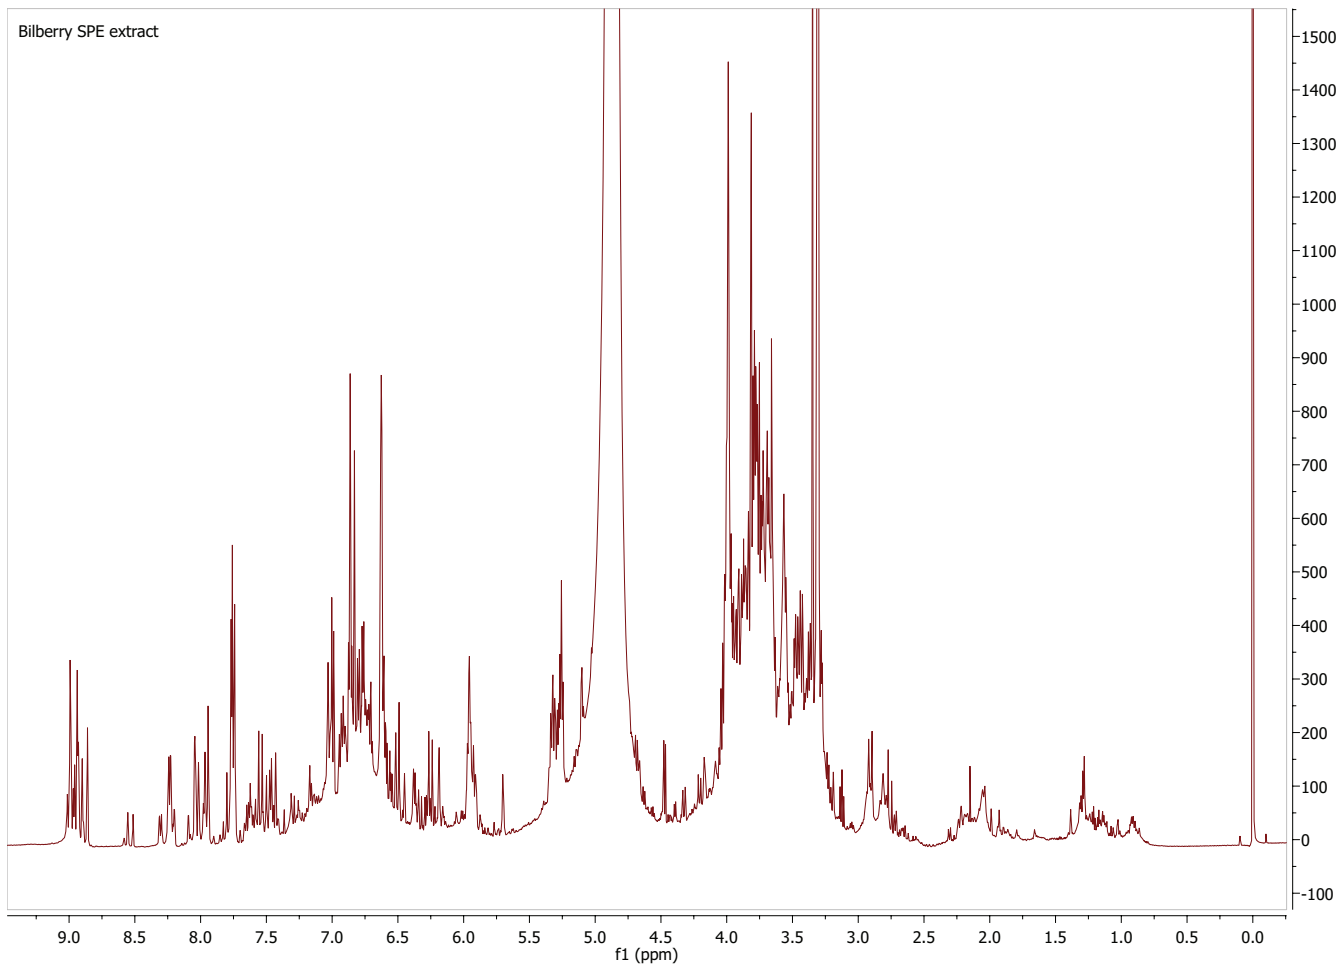

S2.

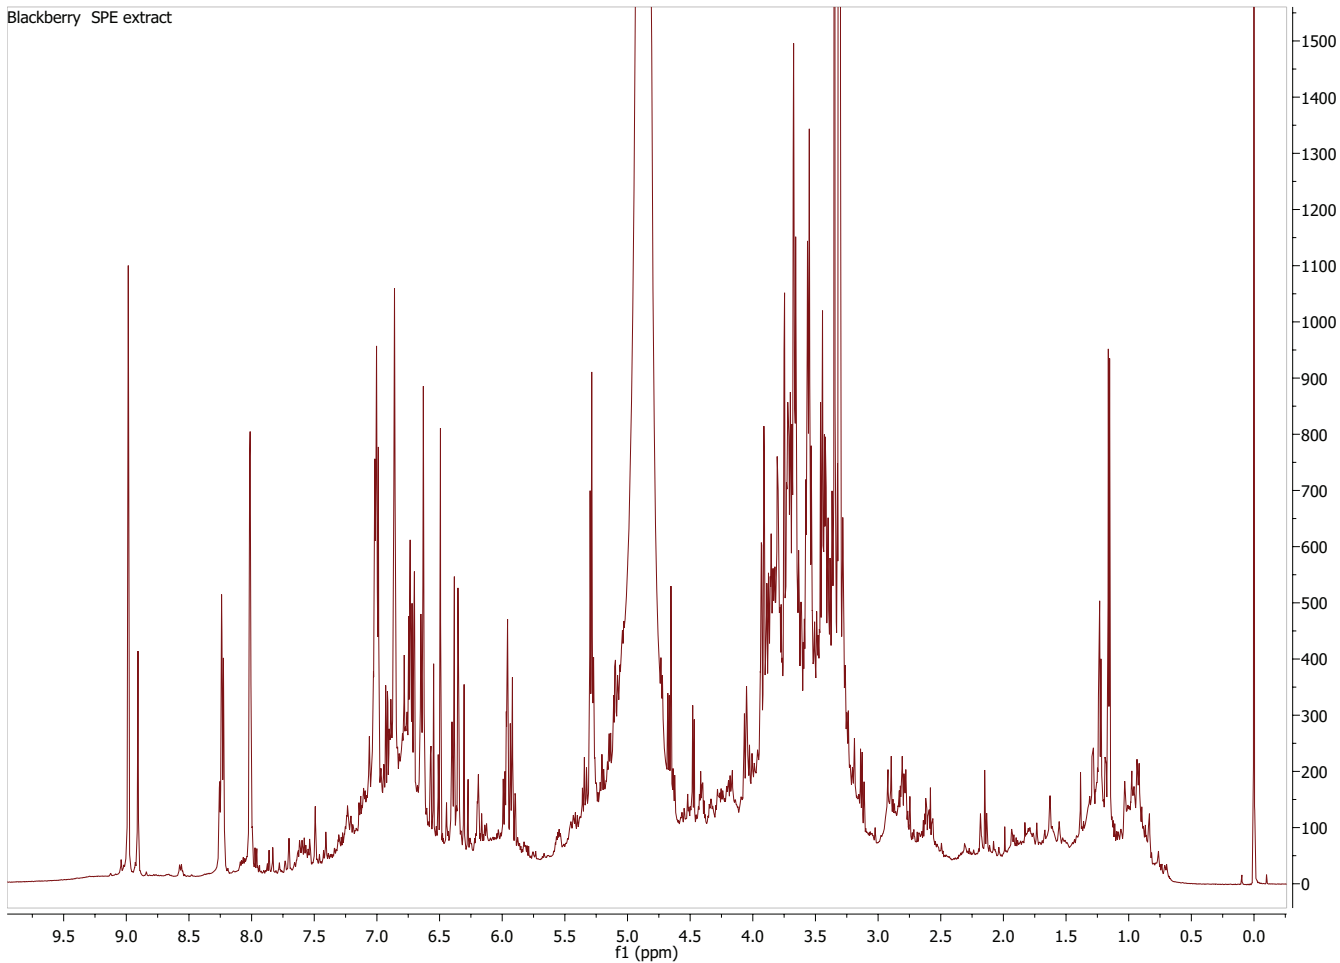

S3.

Black chokeberry SPE extract

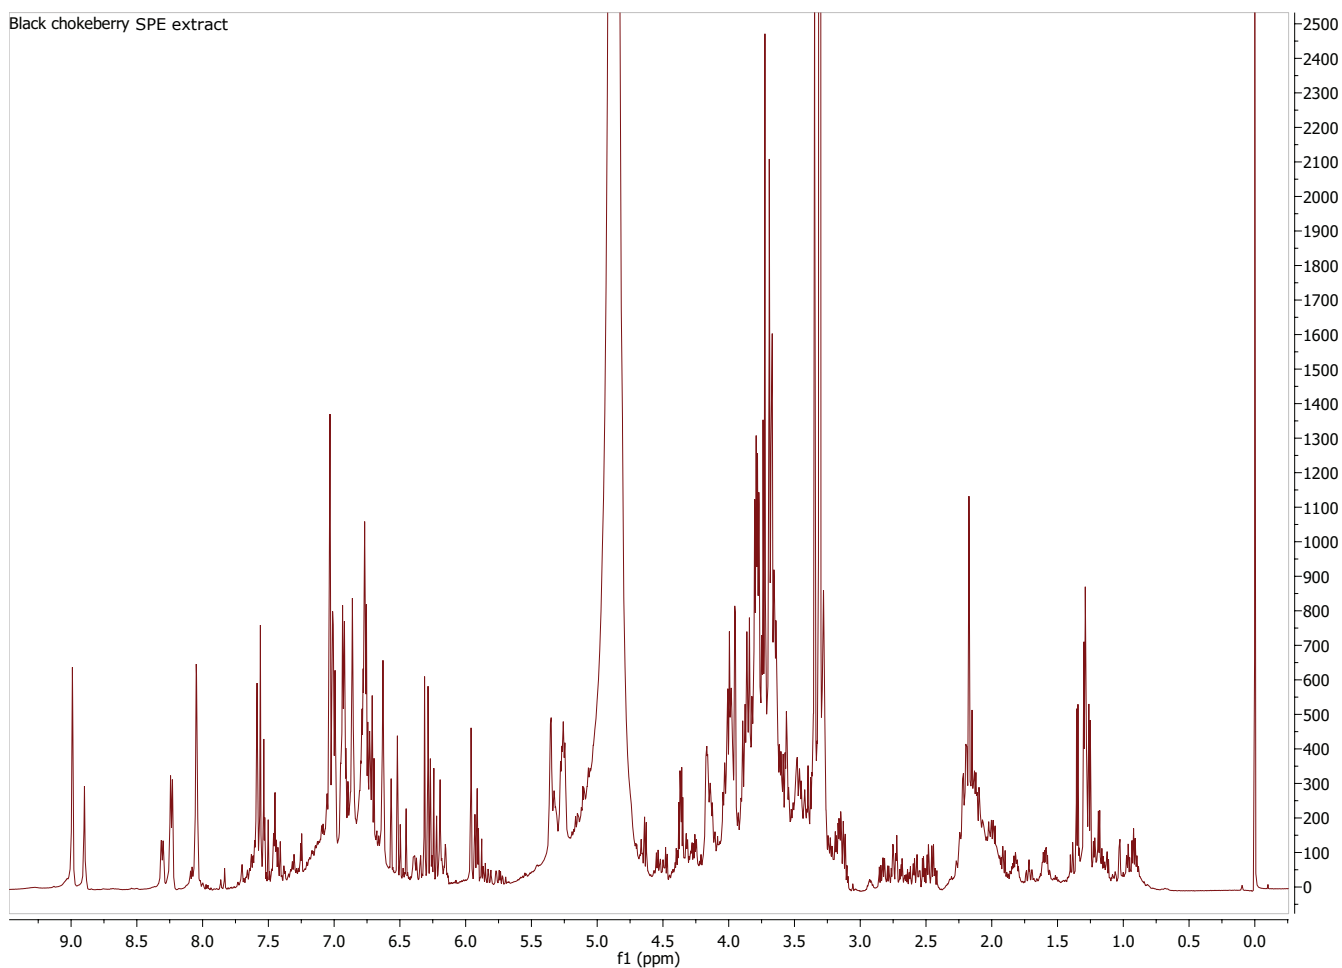

S4.

Black currant SPE extract

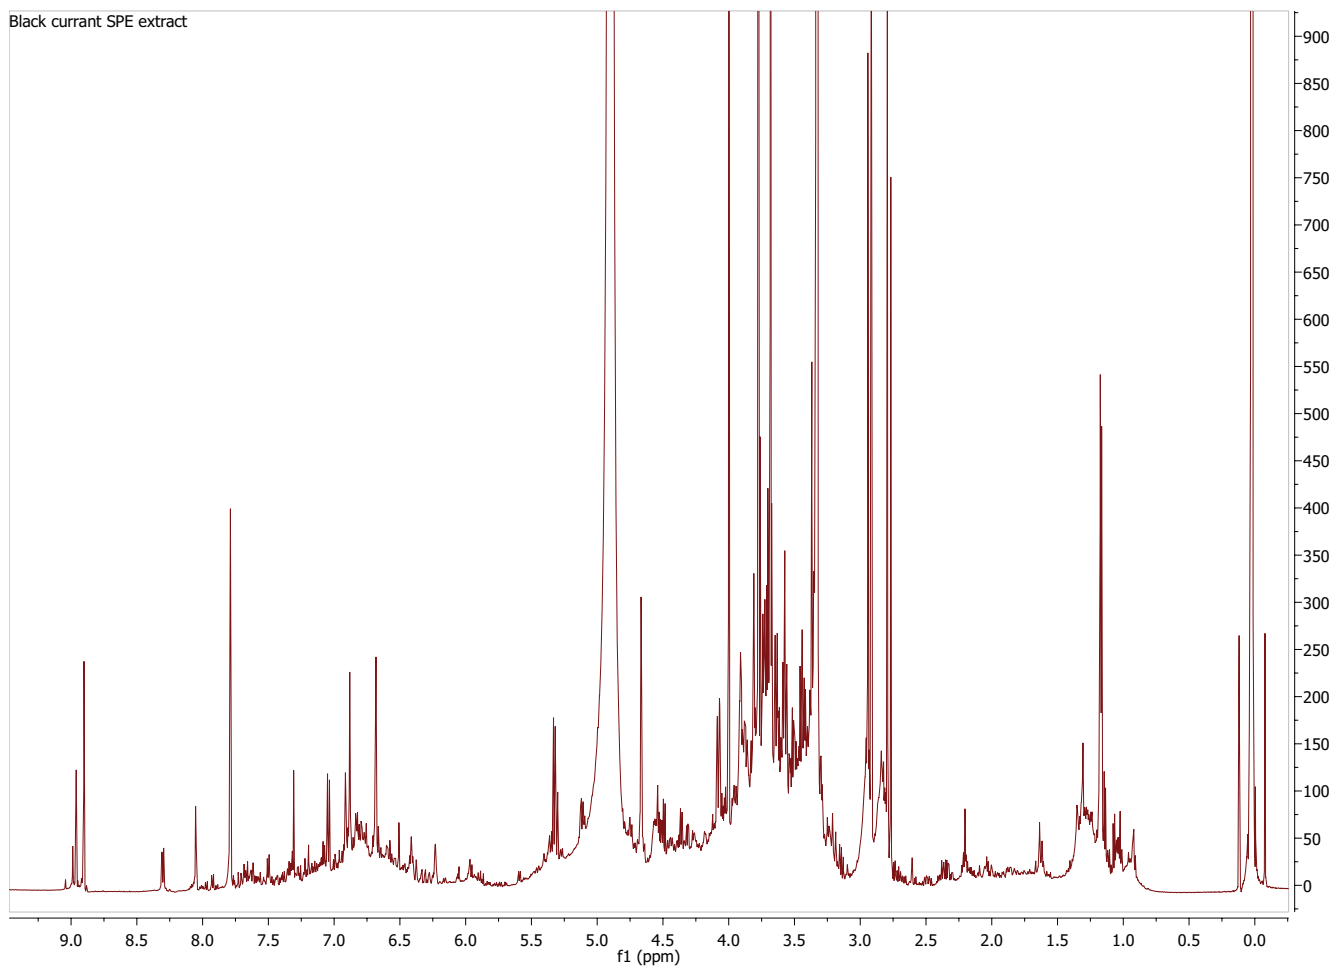

S5.

Blueberry SPE extract

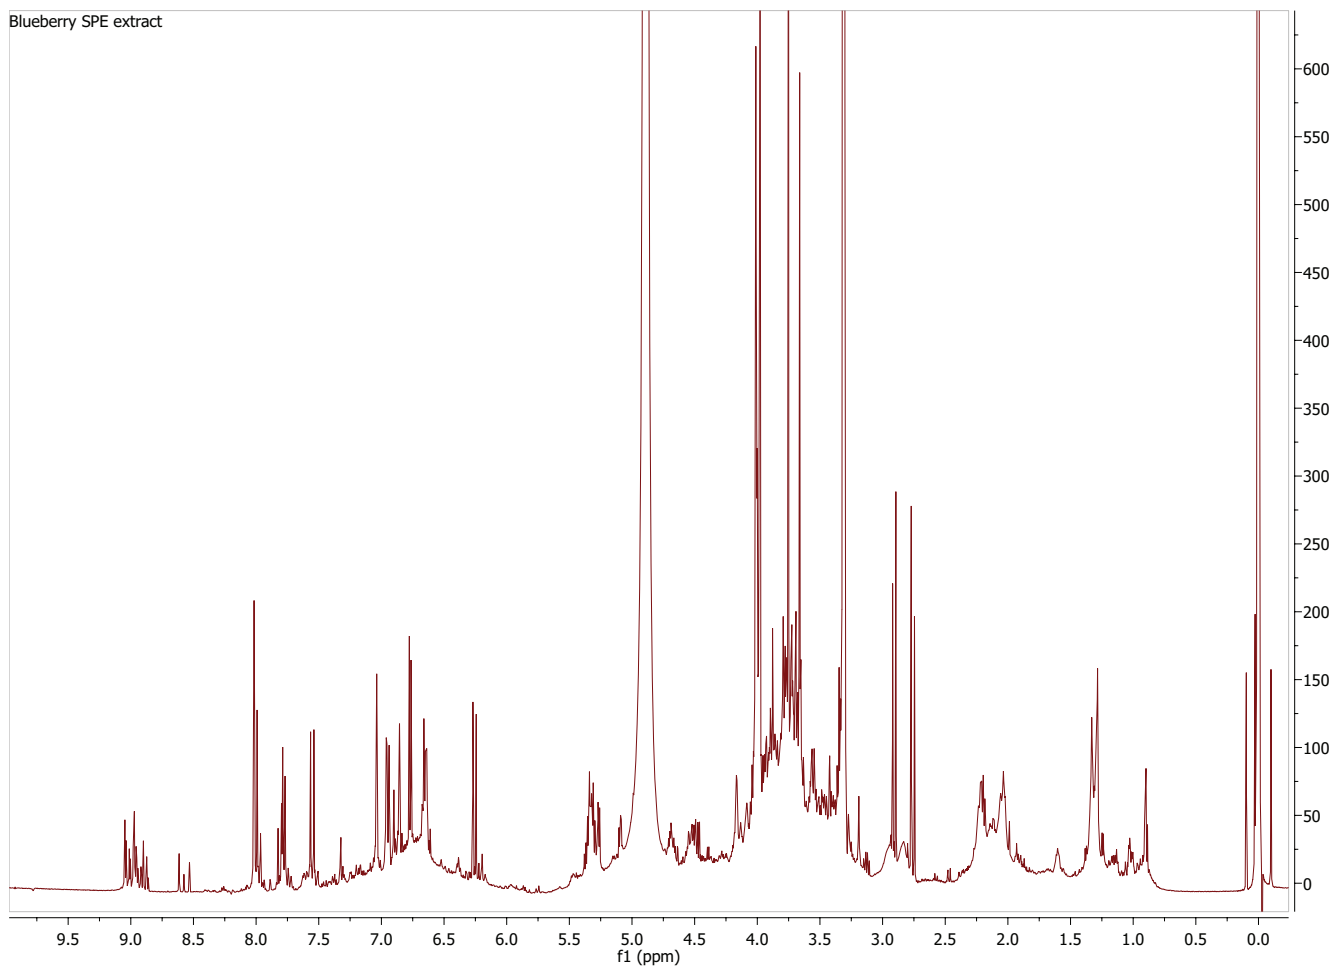

S6.

Bog whortleberry SPE extract

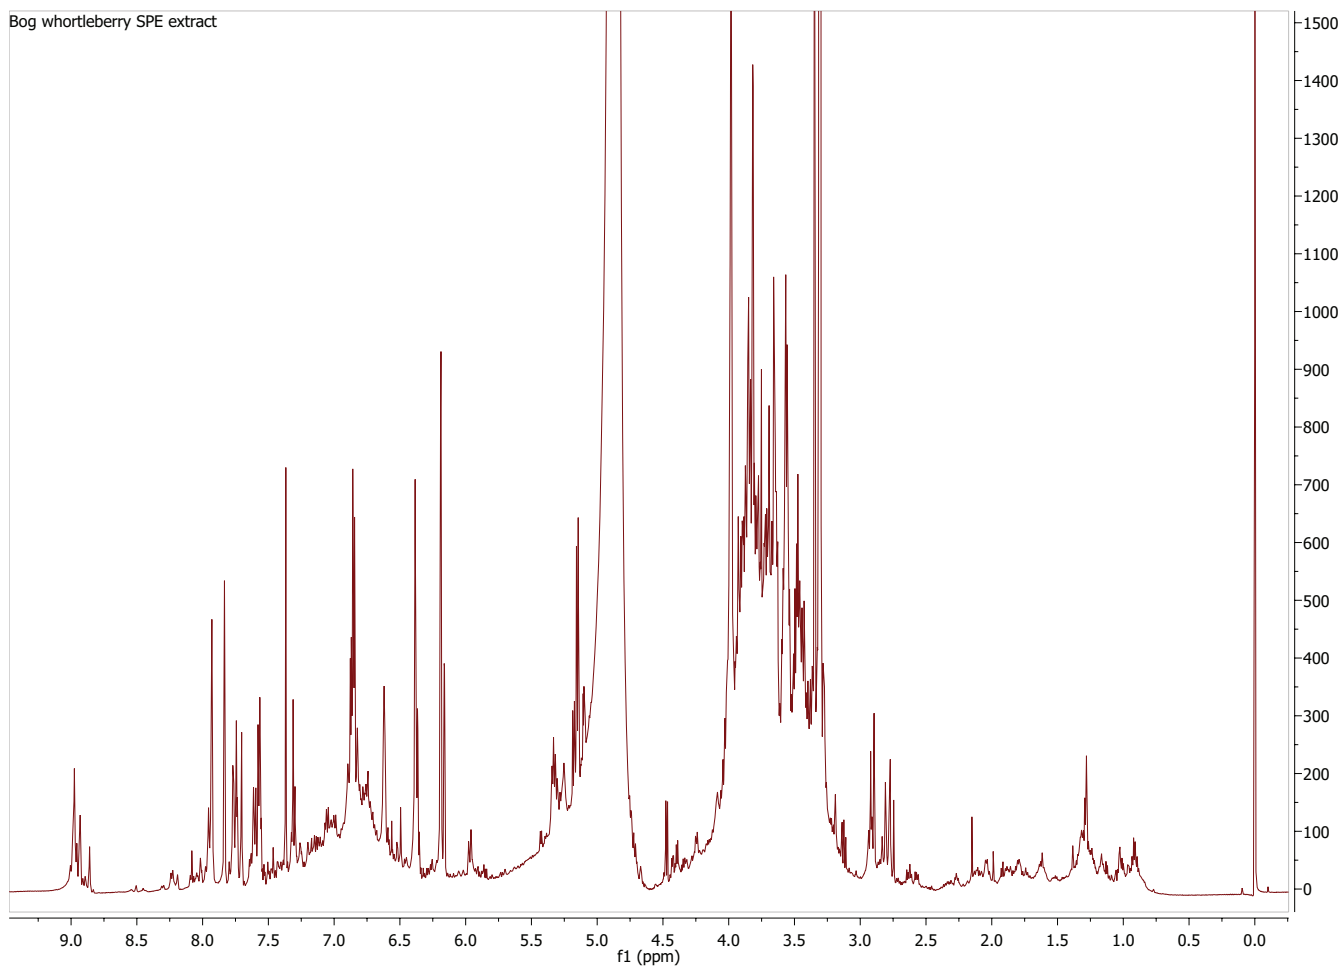

S7.

Cloudberry SPE extract

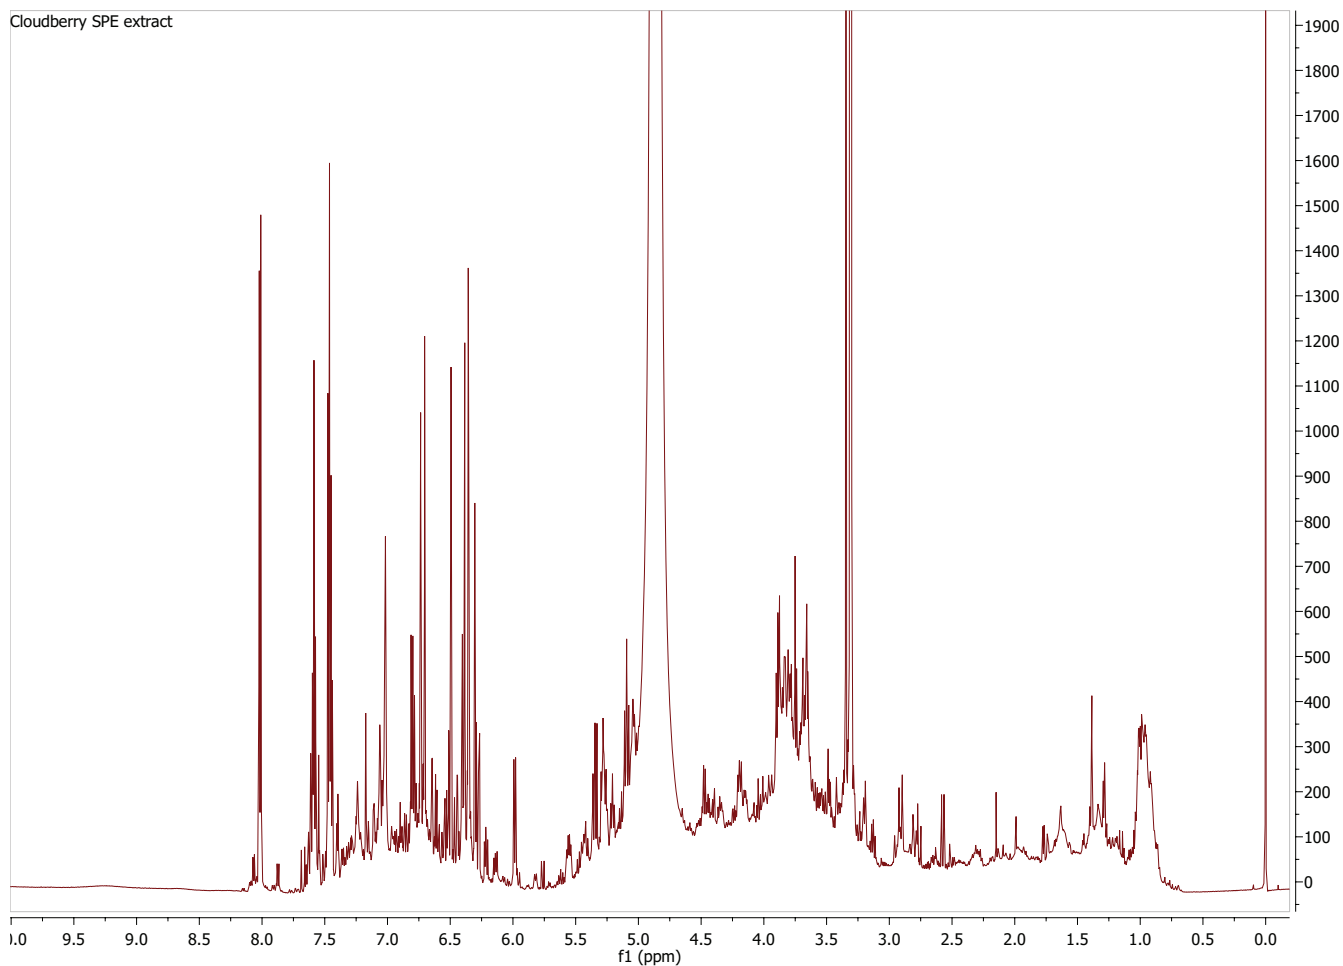

S8.

Crowberry SPE extract

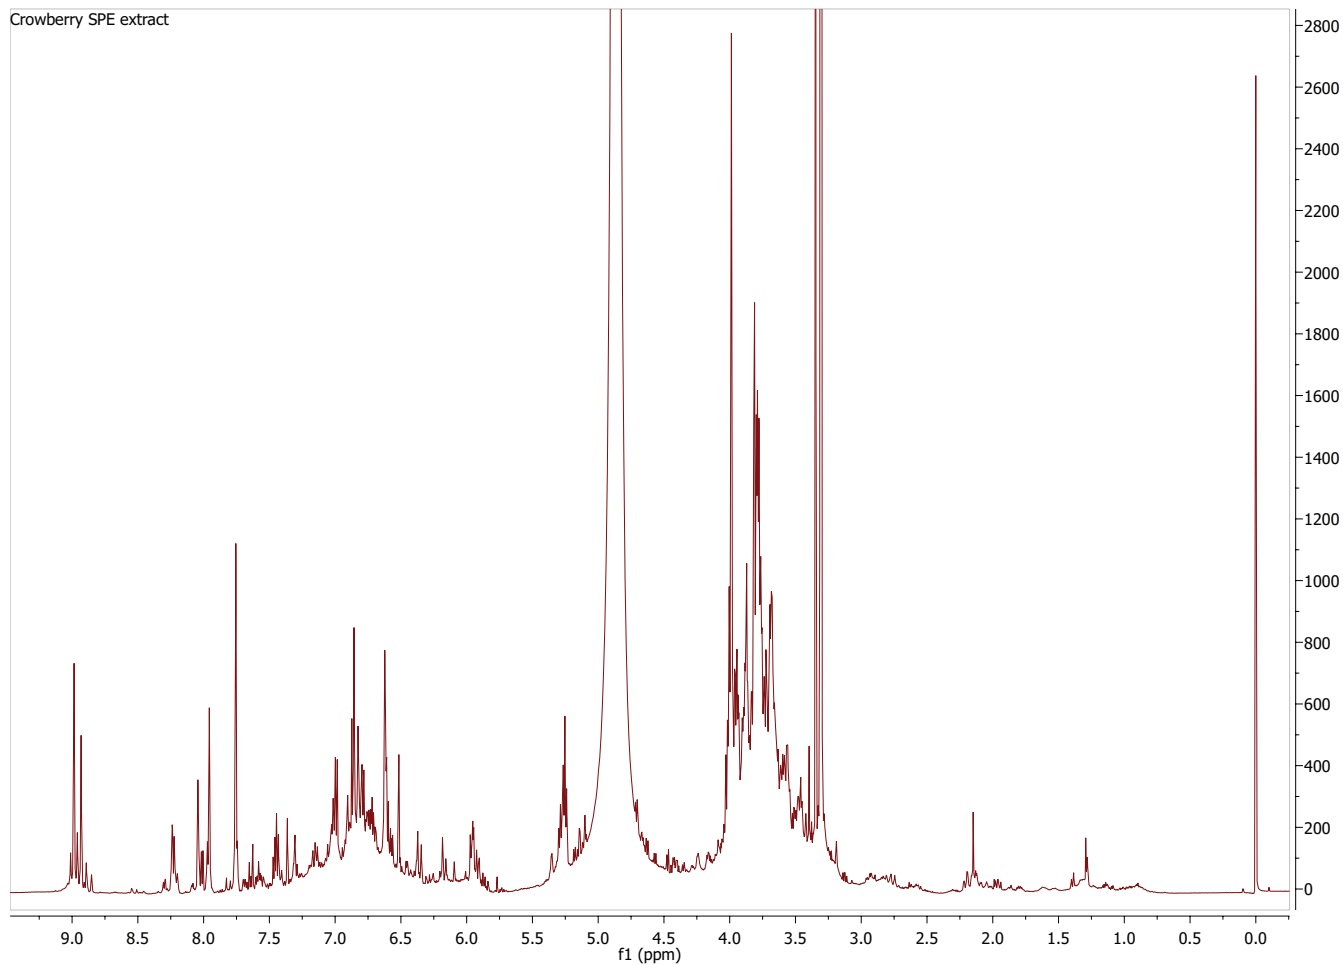

S9.

Elderberry SPE extract

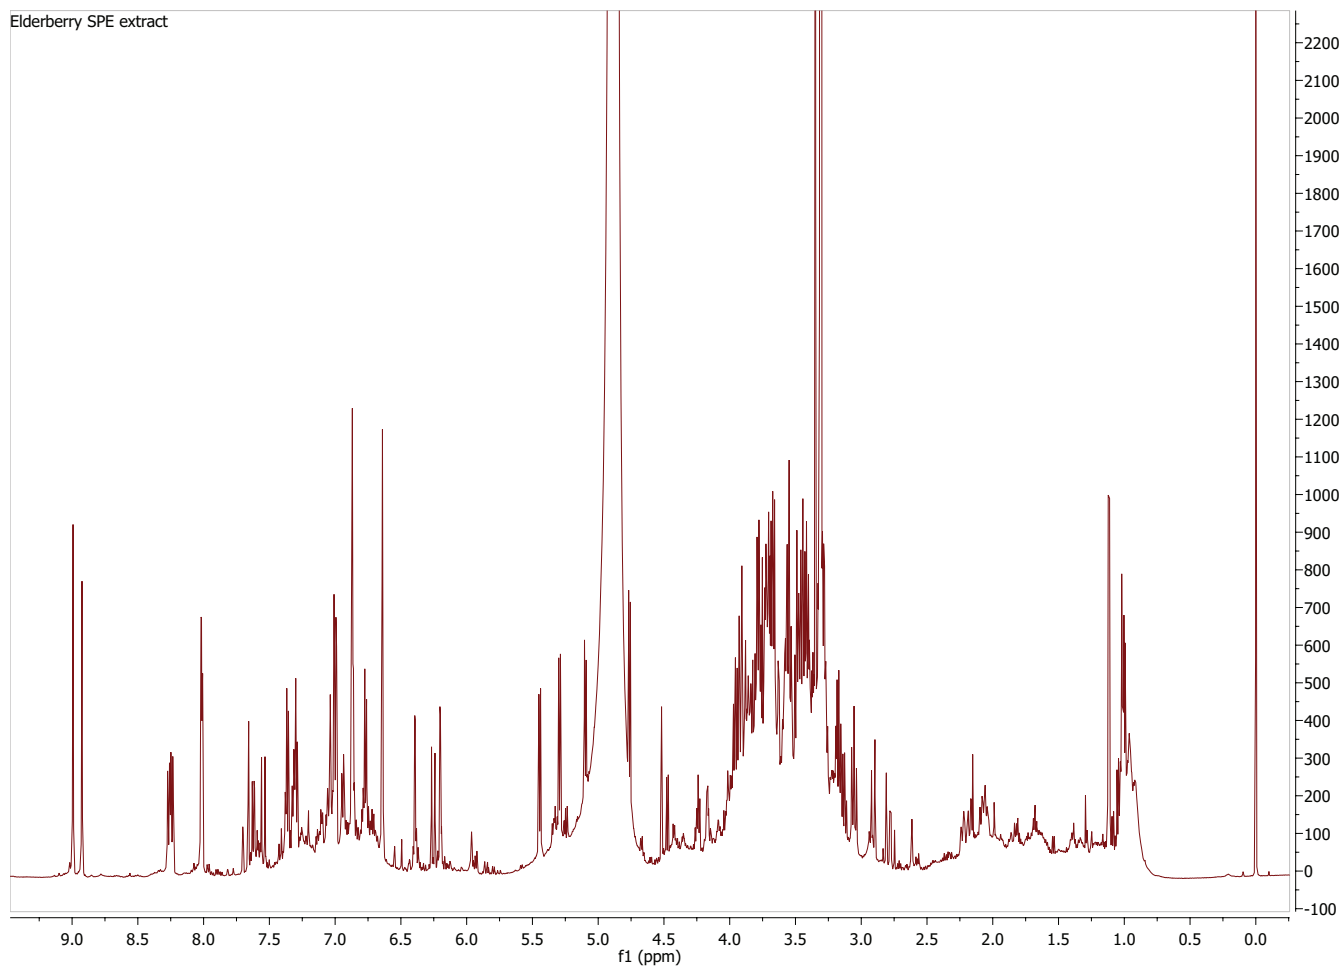

S10.

Lingonberry SPE extract

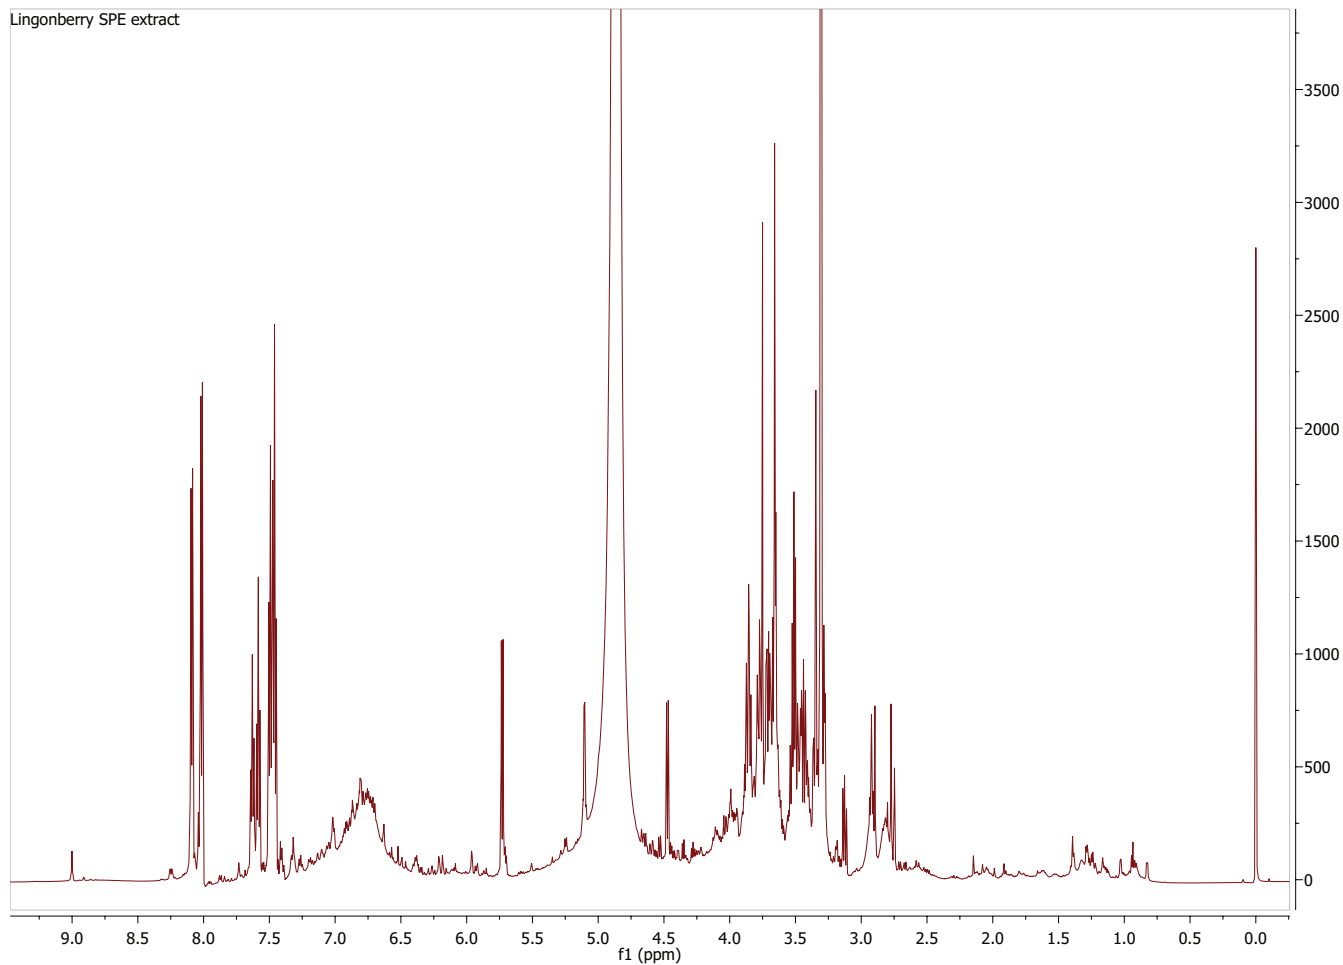

S11.

Raspberry SPE extract

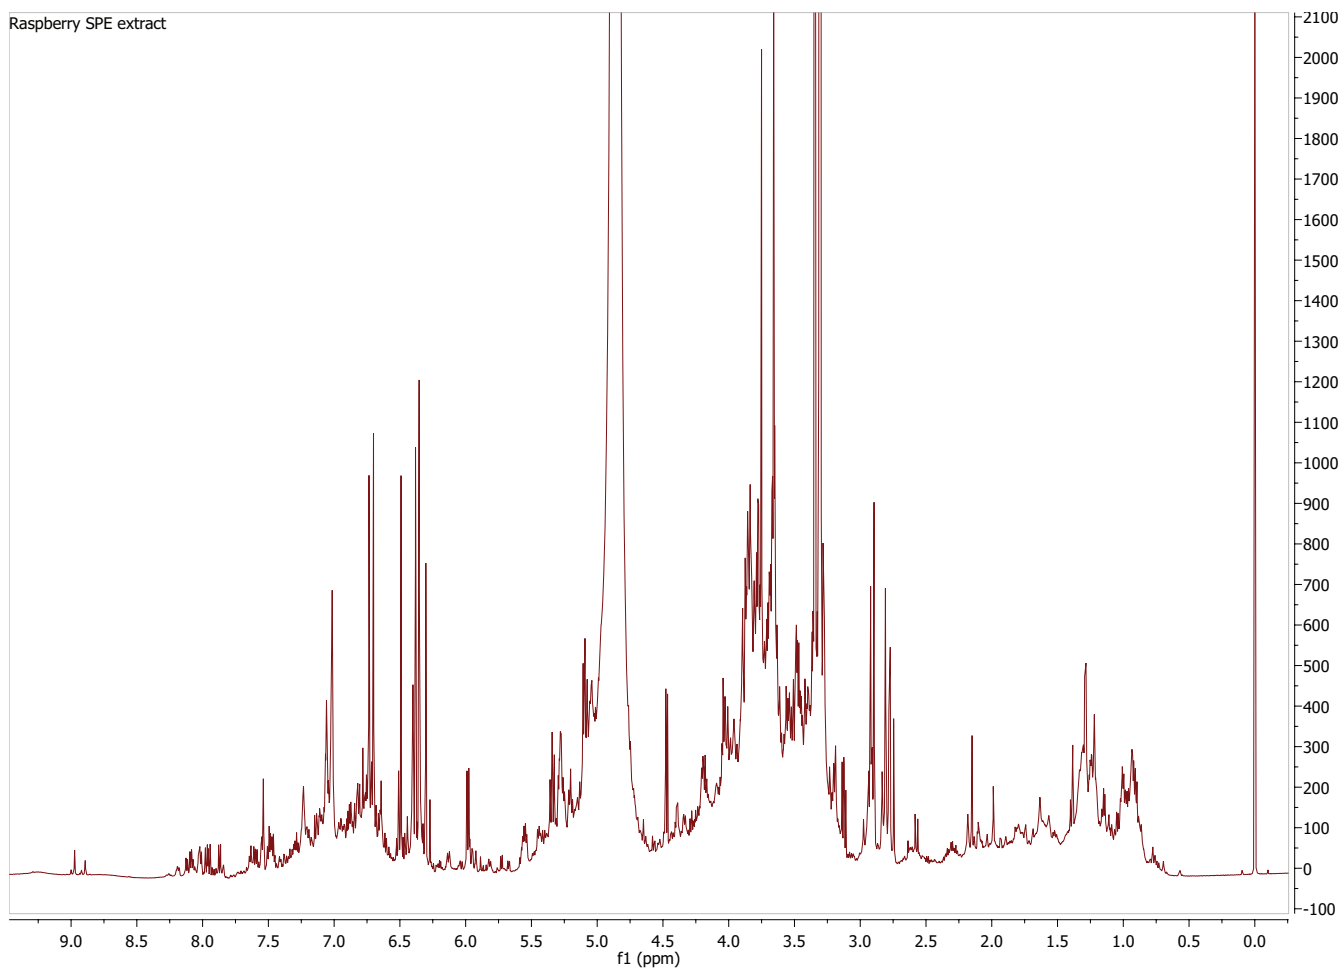

S12.

Red currant SPE extract

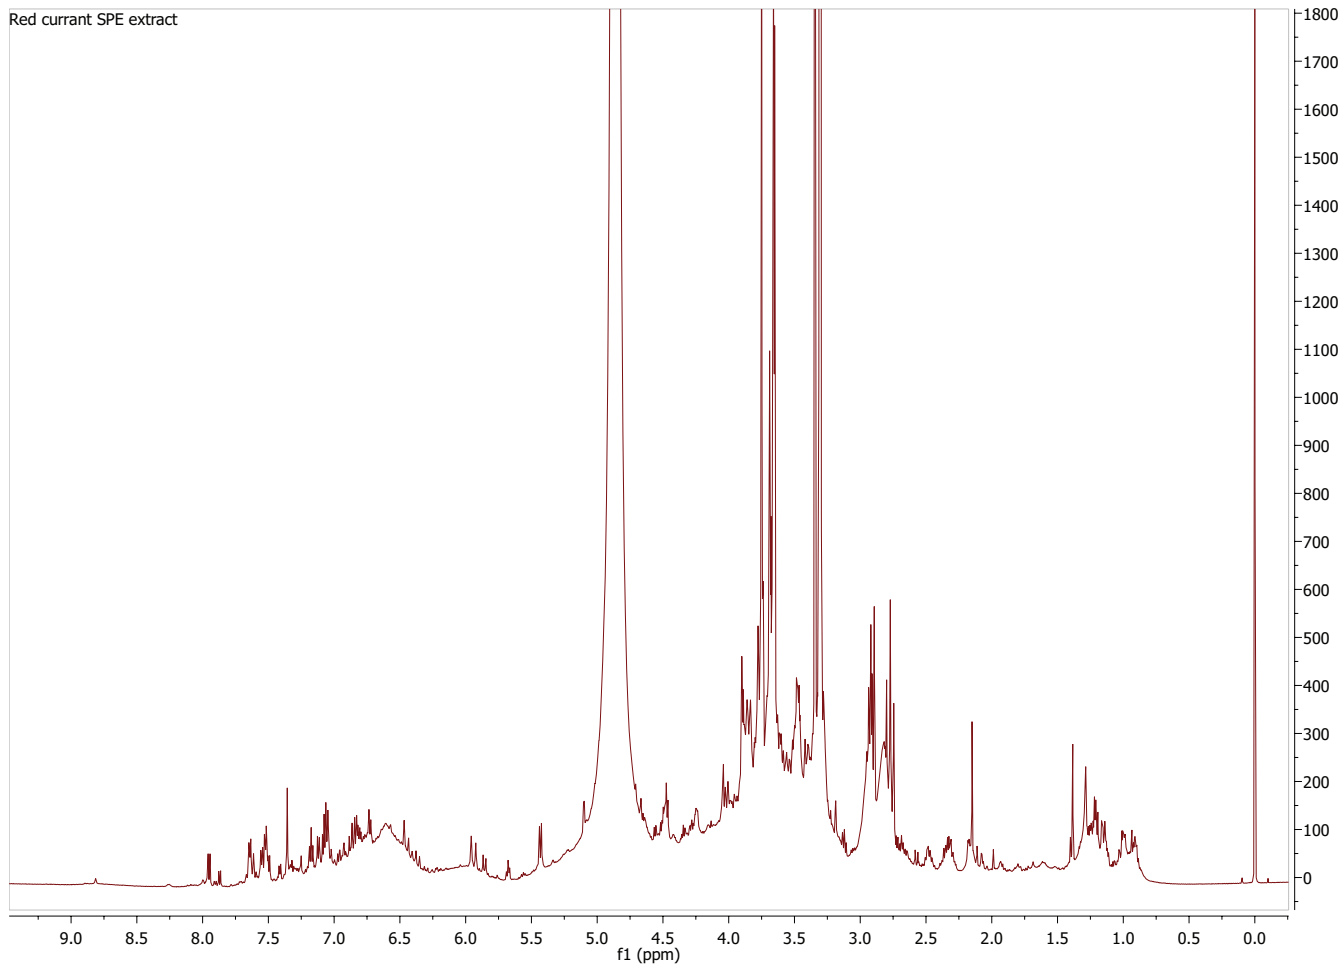

S13.

Rowanberry SPE extract

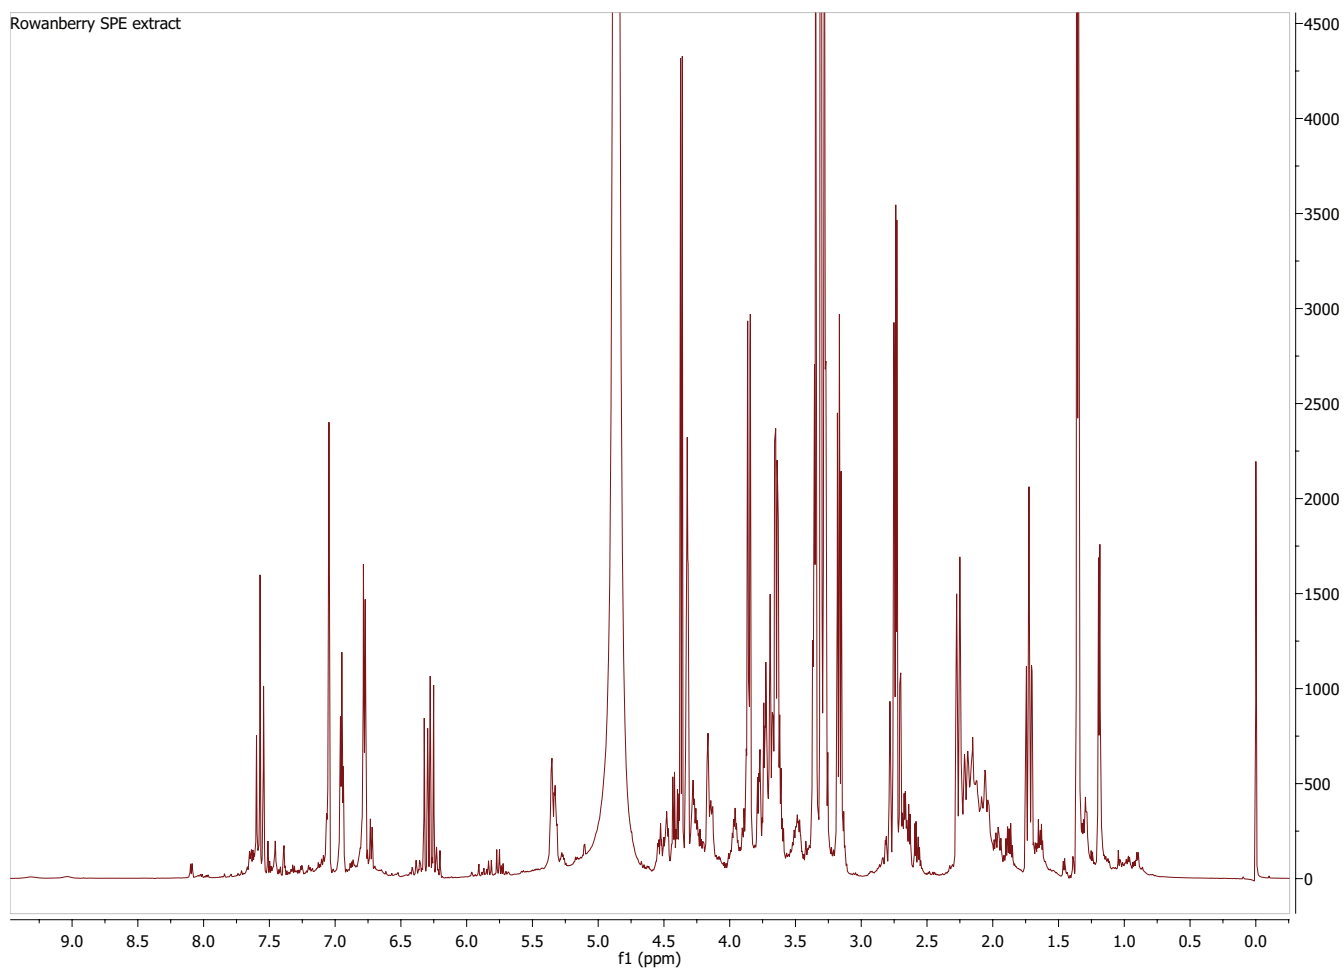

S14.

Sea buckthorn SPE extract

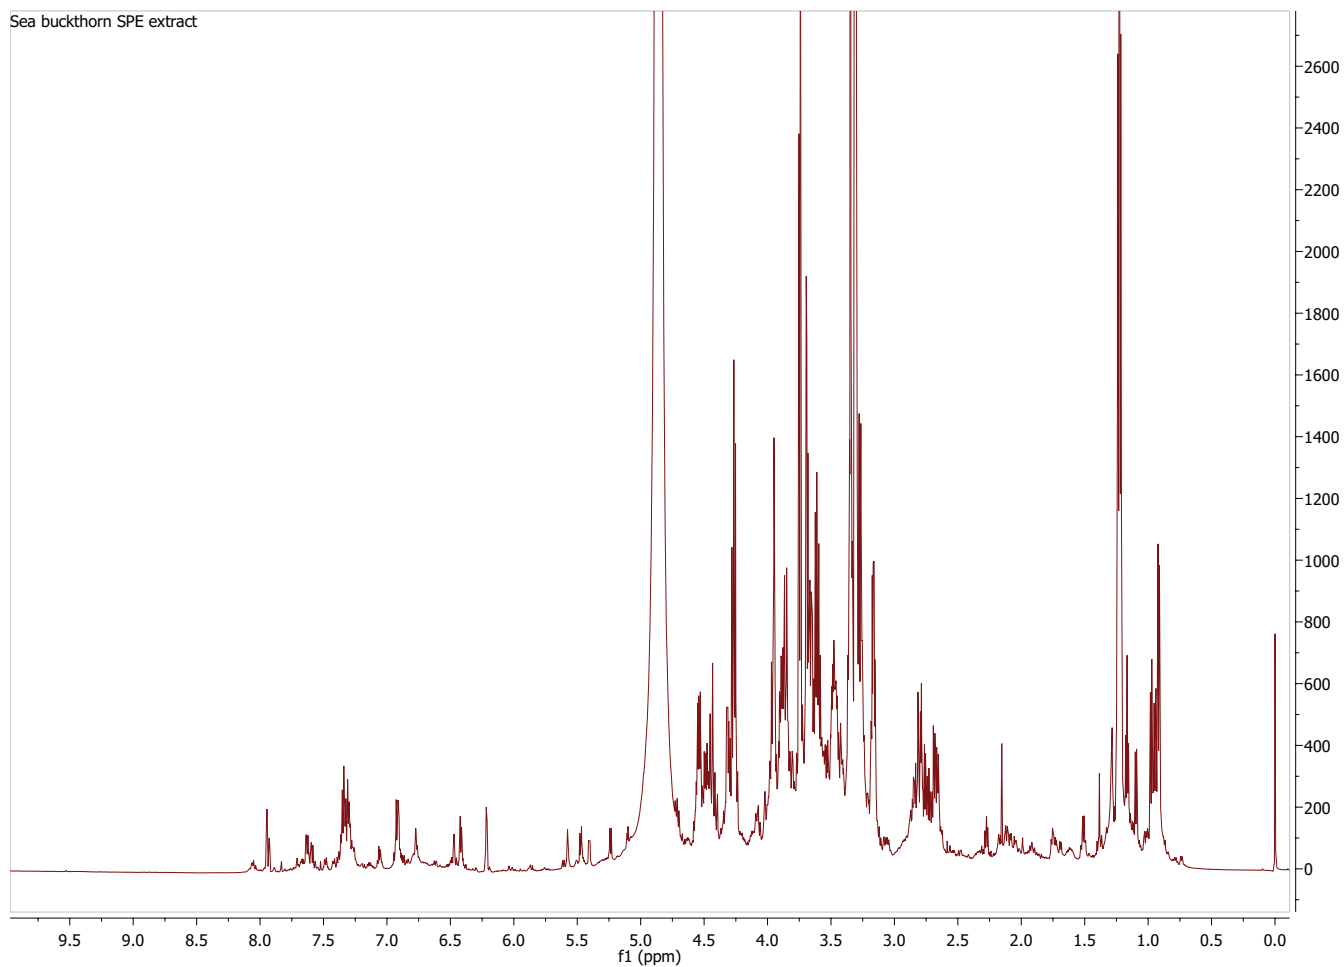

Supplement: Supplementary file 1 [file molecules-22-01806-s001.pdf]
